# Supplementary material for: Comparative Transcriptomics And eQTL Mapping Of Response To Melampsora Americana In Selected Salix Purpurea F2 Progeny
Source: Research Square preprint supplement (doi:10.21203/rs.3.rs-592685/v1), 2021-06-16
Supplement: Supplementary file 1 [file bdbec078f4b7a0e1e324b47f.xlsx]

## Sheet: START HERE
Tabs are named after the each eQTL hotspot group
Each sheet has the following header:
DATE	JOB ID	INPUT	ANNOT	SIG TERMS
7.11	5.78895e+08	1769	1540	90
^	^	^	^	^
Date analysis was performed	AgriGO job ID	Number of genes with Arabidopsis gene IDs associated with eQTL hotspot	Number of input genes with GO annotation	Number of significant GO terms identified from input list

## Sheet: R-Turquoise
DATE	JOB ID	INPUT#	ANNOT#	SIG TERMS
7.11	7.89052e+08	4866	3388	208
GO term	Ontology	Description	Number in input list	Number in BG/Ref	p-value	FDR
GO:0006950	P	response to stress	385	1198	1.6e-15	9.4e-12
GO:1901564	P	organonitrogen compound metabolic process	296	905	1.7e-13	5e-10
GO:0044267	P	cellular protein metabolic process	410	1340	6e-13	1.2e-09
GO:0006518	P	peptide metabolic process	154	413	1.5e-12	2.3e-09
GO:0043603	P	cellular amide metabolic process	154	419	5.4e-12	6.5e-09
GO:0043043	P	peptide biosynthetic process	149	403	7e-12	6.5e-09
GO:0043604	P	amide biosynthetic process	149	404	8.6e-12	6.5e-09
GO:0006412	P	translation	148	400	7.6e-12	6.5e-09
GO:0010200	P	response to chitin	47	84	1.3e-11	8.7e-09
GO:0009611	P	response to wounding	53	101	1.9e-11	1.2e-08
GO:0050896	P	response to stimulus	663	2362	2.2e-11	1.2e-08
GO:1901566	P	organonitrogen compound biosynthetic process	230	700	3.4e-11	1.6e-08
GO:0010243	P	response to organonitrogen compound	49	91	3.2e-11	1.6e-08
GO:0009607	P	response to biotic stimulus	127	338	6.3e-11	2.7e-08
GO:0042254	P	ribosome biogenesis	51	98	6.8e-11	2.7e-08
GO:0019538	P	protein metabolic process	451	1553	1.6e-10	5.9e-08
GO:0019748	P	secondary metabolic process	47	90	3.1e-10	1.1e-07
GO:0043207	P	response to external biotic stimulus	122	329	3.7e-10	1.1e-07
GO:0051707	P	response to other organism	122	329	3.7e-10	1.1e-07
GO:0042221	P	response to chemical	304	994	3.4e-10	1.1e-07
GO:0006952	P	defense response	123	335	6.4e-10	1.8e-07
GO:0022613	P	ribonucleoprotein complex biogenesis	51	105	1.6e-09	4.4e-07
GO:1901700	P	response to oxygen-containing compound	197	609	2.8e-09	7.3e-07
GO:0016053	P	organic acid biosynthetic process	84	212	5.1e-09	1.3e-06
GO:0009694	P	jasmonic acid metabolic process	16	19	1.3e-08	3.2e-06
GO:0044710	P	single-organism metabolic process	383	1340	1.7e-08	3.9e-06
GO:0006082	P	organic acid metabolic process	155	467	1.8e-08	3.9e-06
GO:0044283	P	small molecule biosynthetic process	98	267	3.1e-08	6.5e-06
GO:0044281	P	small molecule metabolic process	217	703	3.4e-08	7.1e-06
GO:0009620	P	response to fungus	44	92	3.6e-08	7.2e-06
GO:0046394	P	carboxylic acid biosynthetic process	66	161	4.3e-08	8.4e-06
GO:0009695	P	jasmonic acid biosynthetic process	15	18	5.1e-08	9.6e-06
GO:1901576	P	organic substance biosynthetic process	486	1769	7.3e-08	1.3e-05
GO:0009698	P	phenylpropanoid metabolic process	29	52	1.1e-07	2e-05
GO:0098542	P	defense response to other organism	72	186	1.7e-07	2.9e-05
GO:0009651	P	response to salt stress	79	210	1.9e-07	3.1e-05
GO:0051704	P	multi-organism process	150	466	2.3e-07	3.8e-05
GO:0009719	P	response to endogenous stimulus	199	651	2.4e-07	3.8e-05
GO:0006970	P	response to osmotic stress	85	233	3.1e-07	4.8e-05
GO:0009813	P	flavonoid biosynthetic process	22	36	4.3e-07	6.5e-05
GO:0010033	P	response to organic substance	221	741	4.5e-07	6.5e-05
GO:0008219	P	cell death	51	121	4.9e-07	7e-05
GO:0009058	P	biosynthetic process	507	1885	5.6e-07	7.8e-05
GO:0032787	P	monocarboxylic acid metabolic process	76	205	6e-07	8.2e-05
GO:0002376	P	immune system process	62	158	6.7e-07	8.9e-05
GO:0043436	P	oxoacid metabolic process	129	396	7.3e-07	9.5e-05
GO:0044249	P	cellular biosynthetic process	464	1716	8.1e-07	0.0001
GO:0009056	P	catabolic process	126	386	8.5e-07	0.00011
GO:0044237	P	cellular metabolic process	898	3505	8.7e-07	0.00011
GO:0009605	P	response to external stimulus	145	458	1e-06	0.00012
GO:0044711	P	single-organism biosynthetic process	205	687	1e-06	0.00012
GO:0006955	P	immune response	57	144	1.3e-06	0.00015
GO:0045087	P	innate immune response	56	141	1.4e-06	0.00016
GO:0009617	P	response to bacterium	56	141	1.4e-06	0.00016
GO:0019752	P	carboxylic acid metabolic process	125	386	1.5e-06	0.00016
GO:1901698	P	response to nitrogen compound	51	126	2.1e-06	0.00022
GO:0012501	P	programmed cell death	41	94	2.1e-06	0.00023
GO:0072330	P	monocarboxylic acid biosynthetic process	39	91	6.3e-06	0.00063
GO:0044248	P	cellular catabolic process	107	329	6.2e-06	0.00063
GO:0006979	P	response to oxidative stress	68	189	7.3e-06	0.00072
GO:0016192	P	vesicle-mediated transport	57	151	7.3e-06	0.00072
GO:0044763	P	single-organism cellular process	629	2435	7.6e-06	0.00074
GO:0009814	P	defense response, incompatible interaction	33	73	8e-06	0.00076
GO:0044550	P	secondary metabolite biosynthetic process	28	58	8.1e-06	0.00076
GO:0006626	P	protein targeting to mitochondrion	10	12	1.1e-05	0.00094
GO:0072655	P	establishment of protein localization to mitochondrion	10	12	1.1e-05	0.00094
GO:0070585	P	protein localization to mitochondrion	10	12	1.1e-05	0.00094
GO:0009987	P	cellular process	1214	4910	1.4e-05	0.0012
GO:0009812	P	flavonoid metabolic process	22	42	1.4e-05	0.0012
GO:0006915	P	apoptotic process	22	42	1.4e-05	0.0012
GO:0009699	P	phenylpropanoid biosynthetic process	23	45	1.6e-05	0.0013
GO:0009751	P	response to salicylic acid	38	92	2.3e-05	0.0019
GO:0046034	P	ATP metabolic process	32	73	2.3e-05	0.0019
GO:0016310	P	phosphorylation	162	550	2.5e-05	0.002
GO:0001101	P	response to acid chemical	132	434	2.5e-05	0.002
GO:0042742	P	defense response to bacterium	43	109	2.6e-05	0.0021
GO:0007005	P	mitochondrion organization	16	27	2.9e-05	0.0022
GO:0009753	P	response to jasmonic acid	42	106	2.9e-05	0.0022
GO:0044712	P	single-organism catabolic process	57	158	3.4e-05	0.0025
GO:0009116	P	nucleoside metabolic process	40	100	3.4e-05	0.0025
GO:0008152	P	metabolic process	1096	4440	3.5e-05	0.0026
GO:1901575	P	organic substance catabolic process	107	342	3.8e-05	0.0028
GO:0006839	P	mitochondrial transport	23	47	3.9e-05	0.0028
GO:1901657	P	glycosyl compound metabolic process	41	104	4.1e-05	0.0029
GO:0009119	P	ribonucleoside metabolic process	37	91	4.3e-05	0.003
GO:0009199	P	ribonucleoside triphosphate metabolic process	32	75	4.5e-05	0.0031
GO:0071704	P	organic substance metabolic process	964	3888	4.5e-05	0.0031
GO:0009205	P	purine ribonucleoside triphosphate metabolic process	32	75	4.5e-05	0.0031
GO:0006793	P	phosphorus metabolic process	222	797	5.7e-05	0.0038
GO:0009144	P	purine nucleoside triphosphate metabolic process	32	76	6.1e-05	0.0041
GO:0009723	P	response to ethylene	44	117	8.2e-05	0.0054
GO:0009808	P	lignin metabolic process	13	21	8.7e-05	0.0057
GO:0006796	P	phosphate-containing compound metabolic process	219	791	9.2e-05	0.0059
GO:0006810	P	transport	269	994	9.3e-05	0.0059
GO:0009408	P	response to heat	40	104	9.5e-05	0.006
GO:0009161	P	ribonucleoside monophosphate metabolic process	36	91	0.00011	0.0066
GO:0009123	P	nucleoside monophosphate metabolic process	36	91	0.00011	0.0066
GO:0009141	P	nucleoside triphosphate metabolic process	32	78	0.00011	0.0068
GO:0009404	P	toxin metabolic process	14	24	0.00012	0.007
GO:0051234	P	establishment of localization	269	999	0.00013	0.0078
GO:0006886	P	intracellular protein transport	60	177	0.00016	0.0097
GO:0034613	P	cellular protein localization	63	188	0.00017	0.0097
GO:0009816	P	defense response to bacterium, incompatible interaction	13	22	0.00017	0.0099
GO:0009167	P	purine ribonucleoside monophosphate metabolic process	33	83	0.00018	0.01
GO:0009126	P	purine nucleoside monophosphate metabolic process	33	83	0.00018	0.01
GO:0051179	P	localization	275	1031	0.00021	0.012
GO:0046128	P	purine ribonucleoside metabolic process	34	87	0.00021	0.012
GO:0042278	P	purine nucleoside metabolic process	34	87	0.00021	0.012
GO:0070727	P	cellular macromolecule localization	66	201	0.00023	0.013
GO:0007154	P	cell communication	178	638	0.00024	0.013
GO:0046907	P	intracellular transport	70	217	0.00027	0.015
GO:0009266	P	response to temperature stimulus	86	278	0.0003	0.016
GO:0043632	P	modification-dependent macromolecule catabolic process	51	148	0.00031	0.016
GO:0006511	P	ubiquitin-dependent protein catabolic process	51	148	0.00031	0.016
GO:0019941	P	modification-dependent protein catabolic process	51	148	0.00031	0.016
GO:0044271	P	cellular nitrogen compound biosynthetic process	287	1090	0.00038	0.02
GO:0008037	P	cell recognition	8	11	0.00045	0.022
GO:0009725	P	response to hormone	162	581	0.00044	0.022
GO:0048544	P	recognition of pollen	8	11	0.00045	0.022
GO:0034976	P	response to endoplasmic reticulum stress	8	11	0.00045	0.022
GO:0051603	P	proteolysis involved in cellular protein catabolic process	52	154	0.00047	0.023
GO:0010035	P	response to inorganic substance	93	309	0.00049	0.024
GO:0042981	P	regulation of apoptotic process	5	5	0.0005	0.024
GO:0009082	P	branched-chain amino acid biosynthetic process	6	7	0.00062	0.03
GO:0051649	P	establishment of localization in cell	71	227	0.00066	0.032
GO:0030163	P	protein catabolic process	53	160	0.00069	0.033
GO:0009117	P	nucleotide metabolic process	48	142	0.00073	0.034
GO:1901607	P	alpha-amino acid biosynthetic process	26	65	0.00074	0.035
GO:0044257	P	cellular protein catabolic process	52	157	0.00077	0.036
GO:0009150	P	purine ribonucleotide metabolic process	35	96	0.0008	0.037
GO:0007165	P	signal transduction	157	569	0.00086	0.039
GO:0051641	P	cellular localization	78	256	0.00088	0.04
GO:0015031	P	protein transport	69	222	0.00093	0.042
GO:0090487	P	secondary metabolite catabolic process	10	17	0.001	0.046
GO:0009407	P	toxin catabolic process	10	17	0.001	0.046
GO:0050832	P	defense response to fungus	25	63	0.0011	0.046
GO:0009259	P	ribonucleotide metabolic process	36	101	0.0011	0.046
GO:0045184	P	establishment of protein localization	69	223	0.0011	0.046
GO:0036293	P	response to decreased oxygen levels	8	12	0.0011	0.046
GO:0001666	P	response to hypoxia	8	12	0.0011	0.046
GO:0070482	P	response to oxygen levels	8	12	0.0011	0.046
GO:0006464	P	cellular protein modification process	208	781	0.0011	0.047
GO:0036211	P	protein modification process	208	781	0.0011	0.047
GO:0023052	P	signaling	160	585	0.0012	0.048
GO:0044700	P	single organism signaling	160	585	0.0012	0.048
GO:0003735	F	structural constituent of ribosome	115	242	2e-18	4.1e-15
GO:0005198	F	structural molecule activity	133	320	4.2e-15	4.2e-12
GO:0016491	F	oxidoreductase activity	209	715	3.7e-06	0.0025
GO:0016740	F	transferase activity	502	1907	6.8e-06	0.0034
GO:0022892	F	substrate-specific transporter activity	161	558	8.1e-05	0.029
GO:0016679	F	oxidoreductase activity, acting on diphenols and related substances as donors	10	14	0.0001	0.029
GO:0035251	F	UDP-glucosyltransferase activity	22	46	8.8e-05	0.029
GO:0022891	F	substrate-specific transmembrane transporter activity	140	481	0.00014	0.036
GO:0022626	C	cytosolic ribosome	100	152	1e-30	1.1e-27
GO:0044445	C	cytosolic part	104	163	3.5e-30	1.9e-27
GO:0005829	C	cytosol	201	475	8.1e-23	2.9e-20
GO:0044391	C	ribosomal subunit	97	175	8.8e-22	2.4e-19
GO:0005840	C	ribosome	118	250	1.5e-18	3.2e-16
GO:1990904	C	ribonucleoprotein complex	132	304	8.4e-17	1.3e-14
GO:0030529	C	intracellular ribonucleoprotein complex	132	304	8.4e-17	1.3e-14
GO:0022627	C	cytosolic small ribosomal subunit	44	62	2.4e-16	3.3e-14
GO:0022625	C	cytosolic large ribosomal subunit	50	78	1.6e-15	1.9e-13
GO:0071944	C	cell periphery	360	1131	4.4e-14	4.8e-12
GO:0015935	C	small ribosomal subunit	45	71	7.4e-14	7.3e-12
GO:0005783	C	endoplasmic reticulum	108	267	9.5e-12	8e-10
GO:0005886	C	plasma membrane	291	916	9.5e-12	8e-10
GO:0032991	C	macromolecular complex	337	1118	2.7e-10	2.1e-08
GO:0015934	C	large ribosomal subunit	52	104	3e-10	2.2e-08
GO:0005740	C	mitochondrial envelope	61	133	8.1e-10	5.5e-08
GO:0044429	C	mitochondrial part	69	161	2.5e-09	1.6e-07
GO:0031966	C	mitochondrial membrane	57	127	7.5e-09	4.5e-07
GO:0016020	C	membrane	622	2298	2e-08	1.2e-06
GO:0000502	C	proteasome complex	26	42	2.7e-08	1.4e-06
GO:0005743	C	mitochondrial inner membrane	47	103	7.8e-08	4e-06
GO:0031090	C	organelle membrane	116	337	1.1e-07	5.4e-06
GO:1902495	C	transmembrane transporter complex	14	17	2e-07	8.8e-06
GO:1990351	C	transporter complex	14	17	2e-07	8.8e-06
GO:0098798	C	mitochondrial protein complex	24	41	4e-07	1.8e-05
GO:0098800	C	inner mitochondrial membrane protein complex	23	39	5.9e-07	2.4e-05
GO:0005739	C	mitochondrion	214	729	2.2e-06	8.7e-05
GO:0043232	C	intracellular non-membrane-bounded organelle	171	565	2.8e-06	0.0001
GO:0005750	C	mitochondrial respiratory chain complex III	11	13	2.7e-06	0.0001
GO:0043228	C	non-membrane-bounded organelle	171	565	2.8e-06	0.0001
GO:0045275	C	respiratory chain complex III	11	13	2.7e-06	0.0001
GO:0044455	C	mitochondrial membrane part	26	50	3e-06	0.0001
GO:0019866	C	organelle inner membrane	56	144	3.1e-06	0.0001
GO:0005618	C	cell wall	78	227	1.2e-05	0.00036
GO:0030312	C	external encapsulating structure	78	227	1.2e-05	0.00036
GO:0005746	C	mitochondrial respiratory chain	13	19	1.8e-05	0.00052
GO:0070469	C	respiratory chain	28	60	1.8e-05	0.00052
GO:0098803	C	respiratory chain complex	27	57	1.8e-05	0.00052
GO:0070069	C	cytochrome complex	11	15	3e-05	0.00085
GO:0022624	C	proteasome accessory complex	14	23	6e-05	0.0016
GO:0005838	C	proteasome regulatory particle	14	23	6e-05	0.0016
GO:0005839	C	proteasome core complex	12	18	5.7e-05	0.0016
GO:0012505	C	endomembrane system	419	1608	7.4e-05	0.0019
GO:0008540	C	proteasome regulatory particle, base subcomplex	7	8	0.00015	0.0038
GO:0005730	C	nucleolus	45	124	0.00018	0.0043
GO:0005773	C	vacuole	86	282	0.00049	0.012
GO:0044431	C	Golgi apparatus part	22	51	0.00055	0.013
GO:0005777	C	peroxisome	37	102	0.00064	0.014
GO:0042579	C	microbody	37	102	0.00064	0.014
GO:0044425	C	membrane part	181	666	0.00083	0.018
GO:0005737	C	cytoplasm	964	4012	0.0016	0.034
GO:1990204	C	oxidoreductase complex	28	75	0.0017	0.035
GO:0044444	C	cytoplasmic part	896	3726	0.0019	0.04
GO:0031970	C	organelle envelope lumen	5	6	0.0024	0.048
GO:0005758	C	mitochondrial intermembrane space	5	6	0.0024	0.048

## Sheet: R-Blue
DATE	JOB ID	INPUT#	ANNOT#	SIG TERMS
7.11	5.78895e+08	1769	1540	90
GO term	Ontology	Description	Number in input list	Number in BG/Ref	p-value	FDR
GO:0015979	P	photosynthesis	50	97	1.2e-24	3.9e-21
GO:0019684	P	photosynthesis, light reaction	27	58	1.1e-12	1.8e-09
GO:0006334	P	nucleosome assembly	10	18	2e-06	0.0012
GO:0006091	P	generation of precursor metabolites and energy	32	130	1.2e-06	0.0012
GO:0034728	P	nucleosome organization	10	18	2e-06	0.0012
GO:0009767	P	photosynthetic electron transport chain	12	27	3.9e-06	0.0021
GO:0031497	P	chromatin assembly	10	20	6.8e-06	0.0031
GO:0065004	P	protein-DNA complex assembly	10	21	1.2e-05	0.0042
GO:0071824	P	protein-DNA complex subunit organization	10	21	1.2e-05	0.0042
GO:0006461	P	protein complex assembly	28	120	1.6e-05	0.0046
GO:0070271	P	protein complex biogenesis	28	120	1.6e-05	0.0046
GO:0006323	P	DNA packaging	10	23	3.2e-05	0.0078
GO:0034622	P	cellular macromolecular complex assembly	28	124	3e-05	0.0078
GO:0071822	P	protein complex subunit organization	29	132	3.8e-05	0.0085
GO:0019253	P	reductive pentose-phosphate cycle	5	6	5.3e-05	0.011
GO:0009773	P	photosynthetic electron transport in photosystem I	8	16	5.9e-05	0.012
GO:0006333	P	chromatin assembly or disassembly	11	30	8.5e-05	0.016
GO:0065003	P	macromolecular complex assembly	28	133	0.00011	0.02
GO:0015977	P	carbon fixation	5	7	0.00017	0.027
GO:0019685	P	photosynthesis, dark reaction	5	7	0.00017	0.027
GO:0010114	P	response to red light	12	38	0.00021	0.032
GO:0008187	F	poly-pyrimidine tract binding	10	14	6.5e-08	2e-05
GO:0016168	F	chlorophyll binding	12	20	5.5e-08	2e-05
GO:0008266	F	poly(U) RNA binding	10	14	6.5e-08	2e-05
GO:0003727	F	single-stranded RNA binding	10	18	2e-06	0.00046
GO:0044435	C	plastid part	200	583	2.4e-54	1.6e-51
GO:0009579	C	thylakoid	126	279	1.8e-50	5.9e-48
GO:0044434	C	chloroplast part	181	527	1.1e-49	2.4e-47
GO:0009536	C	plastid	417	1860	6.8e-49	1.1e-46
GO:0009507	C	chloroplast	394	1734	5e-48	6.5e-46
GO:0044436	C	thylakoid part	114	244	8.6e-48	9.3e-46
GO:0034357	C	photosynthetic membrane	98	205	1.5e-42	1.4e-40
GO:0031976	C	plastid thylakoid	101	221	1.4e-41	9.8e-40
GO:0009534	C	chloroplast thylakoid	101	221	1.4e-41	9.8e-40
GO:0042651	C	thylakoid membrane	89	190	5.3e-38	3.4e-36
GO:0031984	C	organelle subcompartment	102	248	4.8e-37	2.8e-35
GO:0055035	C	plastid thylakoid membrane	84	176	9.1e-37	4.6e-35
GO:0009535	C	chloroplast thylakoid membrane	84	176	9.1e-37	4.6e-35
GO:0009532	C	plastid stroma	96	258	6.9e-31	3.2e-29
GO:0009570	C	chloroplast stroma	82	227	1e-25	4.4e-24
GO:0031977	C	thylakoid lumen	33	69	1.4e-15	5.6e-14
GO:0031978	C	plastid thylakoid lumen	31	64	6.2e-15	2.3e-13
GO:0009543	C	chloroplast thylakoid lumen	31	64	6.2e-15	2.3e-13
GO:0009521	C	photosystem	23	38	3.3e-14	1.1e-12
GO:0009526	C	plastid envelope	62	222	6.3e-14	2e-12
GO:0044444	C	cytoplasmic part	525	3726	4.7e-13	1.5e-11
GO:0010287	C	plastoglobule	25	52	3e-12	9e-11
GO:0044446	C	intracellular organelle part	240	1511	5.5e-12	1.6e-10
GO:0044422	C	organelle part	240	1512	5.8e-12	1.6e-10
GO:0009941	C	chloroplast envelope	50	179	1.4e-11	3.7e-10
GO:0005737	C	cytoplasm	539	4012	2.1e-10	5.2e-09
GO:0098807	C	chloroplast thylakoid membrane protein complex	15	24	5.1e-10	1.2e-08
GO:0010598	C	NAD(P)H dehydrogenase complex (plastoquinone)	9	10	8.7e-09	2e-07
GO:0043227	C	membrane-bounded organelle	566	4431	5.2e-08	1.1e-06
GO:0043231	C	intracellular membrane-bounded organelle	566	4430	5.1e-08	1.1e-06
GO:0030076	C	light-harvesting complex	11	17	6.6e-08	1.4e-06
GO:0009523	C	photosystem II	13	24	8.2e-08	1.7e-06
GO:0009522	C	photosystem I	10	15	1.8e-07	3.5e-06
GO:0043226	C	organelle	588	4698	3.4e-07	6.3e-06
GO:0043229	C	intracellular organelle	588	4697	3.3e-07	6.3e-06
GO:0016020	C	membrane	300	2298	4.4e-06	8e-05
GO:0030095	C	chloroplast photosystem II	9	16	5.7e-06	0.0001
GO:0031975	C	envelope	67	386	6.8e-06	0.00011
GO:0031967	C	organelle envelope	67	386	6.8e-06	0.00011
GO:0044424	C	intracellular part	638	5315	1.3e-05	0.00021
GO:0010319	C	stromule	13	35	1.7e-05	0.00026
GO:0031225	C	anchored component of membrane	29	134	5e-05	0.00077
GO:0005622	C	intracellular	650	5501	5.1e-05	0.00077
GO:0009547	C	plastid ribosome	6	9	6.2e-05	0.00092
GO:0009295	C	nucleoid	10	25	7.6e-05	0.0011
GO:0000229	C	cytoplasmic chromosome	8	17	0.0001	0.0014
GO:0009508	C	plastid chromosome	8	17	0.0001	0.0014
GO:0009654	C	photosystem II oxygen evolving complex	6	10	0.00014	0.0019
GO:0045298	C	tubulin complex	6	10	0.00014	0.0019
GO:0009538	C	photosystem I reaction center	5	7	0.00017	0.0022
GO:0044464	C	cell part	837	7308	0.00024	0.003
GO:0005623	C	cell	837	7308	0.00024	0.003
GO:0042646	C	plastid nucleoid	8	20	0.0004	0.0049
GO:0009706	C	chloroplast inner membrane	11	37	0.00069	0.0083
GO:0098796	C	membrane protein complex	44	271	0.00091	0.011
GO:0009528	C	plastid inner membrane	11	40	0.0014	0.016
GO:0000786	C	nucleosome	5	10	0.0016	0.018
GO:0031969	C	chloroplast membrane	14	60	0.0019	0.022
GO:0000313	C	organellar ribosome	6	15	0.0022	0.024
GO:0005576	C	extracellular region	23	124	0.0025	0.028
GO:0044815	C	DNA packaging complex	5	11	0.0027	0.029
GO:0044425	C	membrane part	89	666	0.0032	0.033
GO:0042170	C	plastid membrane	15	70	0.0033	0.034
GO:0030312	C	external encapsulating structure	36	227	0.0036	0.036
GO:0005618	C	cell wall	36	227	0.0036	0.036

## Sheet: R-Black
DATE	JOB ID	INPUT#	ANNOT#	SIG TERMS
7.11	3.36962e+08	302	283	4
GO term	Ontology	Description	Number in input list	Number in BG/Ref	p-value	FDR
GO:0010876	P	lipid localization	9	68	4.7e-06	0.0035
GO:0006869	P	lipid transport	8	63	2.1e-05	0.008
GO:0016491	F	oxidoreductase activity	30	715	5.5e-05	0.019
GO:0046527	F	glucosyltransferase activity	7	65	0.0002	0.034

## Sheet: R-Brown
DATE	JOB ID	INPUT#	ANNOT#	SIG TERMS
7.11	1.45072e+08	776	711	0
GO term	Ontology	Description	Number in input list	Number in BG/Ref	p-value	FDR
----------- Sorry, No significant term -----------

## Sheet: R-Cyan
DATE	JOB ID	INPUT#	ANNOT#	SIG TERMS
7.11	4.63266e+08	32	30	55
GO term	Ontology	Description	Number in input list	Number in BG/Ref	p-value	FDR
GO:0043043	P	peptide biosynthetic process	14	403	2e-12	7.1e-11
GO:0043604	P	amide biosynthetic process	14	404	2.1e-12	7.1e-11
GO:0043603	P	cellular amide metabolic process	14	419	3.4e-12	7.1e-11
GO:0006518	P	peptide metabolic process	14	413	2.8e-12	7.1e-11
GO:0006412	P	translation	14	400	1.8e-12	7.1e-11
GO:1901566	P	organonitrogen compound biosynthetic process	15	700	3e-10	5.2e-09
GO:1901564	P	organonitrogen compound metabolic process	15	905	8.5e-09	1.3e-07
GO:0044271	P	cellular nitrogen compound biosynthetic process	15	1090	8.7e-08	1.1e-06
GO:0044267	P	cellular protein metabolic process	16	1340	2.3e-07	2.7e-06
GO:0034645	P	cellular macromolecule biosynthetic process	14	1057	3.2e-07	3.3e-06
GO:0009059	P	macromolecule biosynthetic process	14	1079	4e-07	3.8e-06
GO:0010467	P	gene expression	14	1127	6.6e-07	5.8e-06
GO:0019538	P	protein metabolic process	16	1553	1.4e-06	1.2e-05
GO:0044249	P	cellular biosynthetic process	16	1716	4.7e-06	3.5e-05
GO:1901576	P	organic substance biosynthetic process	16	1769	6.7e-06	4.7e-05
GO:0009058	P	biosynthetic process	16	1885	1.4e-05	9.1e-05
GO:0034641	P	cellular nitrogen compound metabolic process	15	1730	1.8e-05	0.00011
GO:0006807	P	nitrogen compound metabolic process	15	1936	6e-05	0.00035
GO:0044260	P	cellular macromolecule metabolic process	16	2357	0.00016	0.00087
GO:0043170	P	macromolecule metabolic process	16	2624	0.00046	0.0024
GO:0044237	P	cellular metabolic process	18	3505	0.0015	0.0073
GO:0044238	P	primary metabolic process	17	3464	0.0027	0.013
GO:0071704	P	organic substance metabolic process	18	3888	0.0038	0.018
GO:0003735	F	structural constituent of ribosome	14	242	2.1e-15	1.2e-14
GO:0005198	F	structural molecule activity	14	320	9.4e-14	2.6e-13
GO:0022626	C	cytosolic ribosome	14	152	3.2e-18	4.6e-16
GO:0044445	C	cytosolic part	14	163	8.5e-18	6.2e-16
GO:0044391	C	ribosomal subunit	14	175	2.3e-17	1.1e-15
GO:0005840	C	ribosome	14	250	3.3e-15	1.2e-13
GO:1990904	C	ribonucleoprotein complex	14	304	4.7e-14	1.1e-12
GO:0030529	C	intracellular ribonucleoprotein complex	14	304	4.7e-14	1.1e-12
GO:0022625	C	cytosolic large ribosomal subunit	9	78	2.3e-13	4.7e-12
GO:0015934	C	large ribosomal subunit	9	104	3.2e-12	5.9e-11
GO:0005829	C	cytosol	14	475	1.7e-11	2.8e-10
GO:0043232	C	intracellular non-membrane-bounded organelle	14	565	1.6e-10	2.1e-09
GO:0043228	C	non-membrane-bounded organelle	14	565	1.6e-10	2.1e-09
GO:0032991	C	macromolecular complex	15	1118	1.2e-07	1.4e-06
GO:0022627	C	cytosolic small ribosomal subunit	5	62	2.5e-07	2.8e-06
GO:0015935	C	small ribosomal subunit	5	71	5e-07	5.1e-06
GO:0044446	C	intracellular organelle part	15	1511	4.1e-06	3.8e-05
GO:0044422	C	organelle part	15	1512	4.1e-06	3.8e-05
GO:0005730	C	nucleolus	5	124	7.7e-06	6.6e-05
GO:0031981	C	nuclear lumen	5	223	0.00013	0.001
GO:0031974	C	membrane-enclosed lumen	5	264	0.00027	0.0019
GO:0043233	C	organelle lumen	5	264	0.00027	0.0019
GO:0070013	C	intracellular organelle lumen	5	264	0.00027	0.0019
GO:0005773	C	vacuole	5	282	0.00037	0.0024
GO:0044428	C	nuclear part	5	299	0.00048	0.003
GO:0043226	C	organelle	22	4698	0.0017	0.01
GO:0043229	C	intracellular organelle	22	4697	0.0017	0.01
GO:0044444	C	cytoplasmic part	18	3726	0.0026	0.015
GO:0005634	C	nucleus	9	1405	0.0039	0.021
GO:0005622	C	intracellular	23	5501	0.0048	0.025
GO:0005737	C	cytoplasm	18	4012	0.0051	0.025
GO:0044424	C	intracellular part	22	5315	0.006	0.029

## Sheet: R-Green
DATE	JOB ID	INPUT#	ANNOT#	SIG TERMS
7.11	7.14329e+08	585	530	29
GO term	Ontology	Description	Number in input list	Number in BG/Ref	p-value	FDR
GO:1901564	P	organonitrogen compound metabolic process	66	905	4.4e-08	7.3e-05
GO:1901566	P	organonitrogen compound biosynthetic process	50	700	2.5e-06	0.0021
GO:0043603	P	cellular amide metabolic process	32	419	3.6e-05	0.019
GO:0043043	P	peptide biosynthetic process	30	403	9.5e-05	0.019
GO:0006807	P	nitrogen compound metabolic process	102	1936	5.8e-05	0.019
GO:0006518	P	peptide metabolic process	31	413	6.4e-05	0.019
GO:0043604	P	amide biosynthetic process	30	404	0.0001	0.019
GO:0044249	P	cellular biosynthetic process	91	1716	0.0001	0.019
GO:0006412	P	translation	30	400	8.4e-05	0.019
GO:0008135	F	translation factor activity, RNA binding	14	92	3.4e-06	0.0018
GO:0044444	C	cytoplasmic part	211	3726	6.4e-10	3e-07
GO:0005737	C	cytoplasm	219	4012	5.2e-09	1.2e-06
GO:0005739	C	mitochondrion	53	729	8e-07	0.00013
GO:0044424	C	intracellular part	252	5315	1.1e-05	0.00085
GO:0043229	C	intracellular organelle	225	4697	1.3e-05	0.00085
GO:0005622	C	intracellular	261	5501	7.9e-06	0.00085
GO:0043227	C	membrane-bounded organelle	213	4431	1.6e-05	0.00085
GO:0043226	C	organelle	225	4698	1.3e-05	0.00085
GO:0043231	C	intracellular membrane-bounded organelle	213	4430	1.6e-05	0.00085
GO:0031975	C	envelope	29	386	0.0001	0.0045
GO:0031967	C	organelle envelope	29	386	0.0001	0.0045
GO:0005829	C	cytosol	33	475	0.00016	0.0065
GO:0016020	C	membrane	114	2298	0.00023	0.0084
GO:0031090	C	organelle membrane	25	337	0.00035	0.012
GO:0005773	C	vacuole	22	282	0.00038	0.012
GO:0019866	C	organelle inner membrane	14	144	0.00049	0.014
GO:0031966	C	mitochondrial membrane	13	127	0.00047	0.014
GO:0005740	C	mitochondrial envelope	13	133	0.00073	0.019
GO:0016021	C	integral component of membrane	17	205	0.00084	0.021

## Sheet: R-GreenYellow
DATE	JOB ID	INPUT#	ANNOT#	SIG TERMS
7.11	7.82534e+08	45	36	22
GO term	Ontology	Description	Number in input list	Number in BG/Ref	p-value	FDR
GO:0009834	P	plant-type secondary cell wall biogenesis	7	15	4.7e-15	6.1e-13
GO:0009832	P	plant-type cell wall biogenesis	7	49	5.8e-11	3.8e-09
GO:0042546	P	cell wall biogenesis	7	54	1.2e-10	5.1e-09
GO:0071669	P	plant-type cell wall organization or biogenesis	7	79	1.8e-09	5.9e-08
GO:0071554	P	cell wall organization or biogenesis	8	143	5.3e-09	1.4e-07
GO:0044264	P	cellular polysaccharide metabolic process	6	77	5.4e-08	1.2e-06
GO:0005976	P	polysaccharide metabolic process	6	92	1.6e-07	2.9e-06
GO:0033692	P	cellular polysaccharide biosynthetic process	5	52	2.3e-07	3.8e-06
GO:0044262	P	cellular carbohydrate metabolic process	6	114	5.6e-07	7.4e-06
GO:0000271	P	polysaccharide biosynthetic process	5	62	5.7e-07	7.4e-06
GO:0034637	P	cellular carbohydrate biosynthetic process	5	70	1e-06	1.2e-05
GO:0016051	P	carbohydrate biosynthetic process	5	130	2.2e-05	0.00023
GO:0044085	P	cellular component biogenesis	7	329	2.6e-05	0.00026
GO:0005975	P	carbohydrate metabolic process	7	412	0.00011	0.00098
GO:0044723	P	single-organism carbohydrate metabolic process	5	259	0.00053	0.0046
GO:0071840	P	cellular component organization or biogenesis	8	887	0.0022	0.018
GO:0016757	F	transferase activity, transferring glycosyl groups	6	296	0.00012	0.00067
GO:0031225	C	anchored component of membrane	7	134	7.2e-08	1.6e-06
GO:0031224	C	intrinsic component of membrane	7	364	5e-05	0.00054
GO:0016020	C	membrane	15	2298	0.0015	0.0093
GO:0044425	C	membrane part	7	666	0.0017	0.0093
GO:0005886	C	plasma membrane	7	916	0.0091	0.039

## Sheet: R-Magenta
DATE	JOB ID	INPUT#	ANNOT#	SIG TERMS
7.11	7.77455e+08	75	72	1
GO term	Ontology	Description	Number in input list	Number in BG/Ref	p-value	FDR
GO:0008194	F	UDP-glycosyltransferase activity	5	112	0.00023	0.0084

## Sheet: R-Pink
DATE	JOB ID	INPUT#	ANNOT#	SIG TERMS
7.11	5.86919e+08	166	154	0
GO term	Ontology	Description	Number in input list	Number in BG/Ref	p-value	FDR
----------- Sorry, No significant term -----------

[truncated: 5 more sheets: R-Purple, R-Red, R-Salmon, R-Tan, R-Yellow]
