# Supplementary material for: Comparative Transcriptomics And eQTL Mapping Of Response To Melampsora Americana In Selected Salix Purpurea F2 Progeny
Source: Research Square preprint supplement (doi:10.21203/rs.3.rs-592685/v1), 2021-06-16
Supplement: Supplementary file 1 [file bec045ec3fdea49f907e4e98.docx]

#### LEGENDS FOR ADDITIONAL FILES

Additional Figure 1

.pdf

Additional Figure 1: Bar graph of total number of differentially expressed transcripts between inoculated and control treatments of Fish Creek (blue) and 94006 (orange) at 1-day intervals for 5 days. Dotted lines represent approximated trends of expression over duration of experiment.

Additional Figure 2

.pdf

Additional Figure 2: Module eigengene correlations with time point as calculated in WGCNA. Time point was coded as 0, 2, 3. The modules from the resistant network are on the left while the susceptible network modules are on the right. Significance was determined at the 0.05 value. Positive correlations become deeper red while negative correlations become blue.

Additional Figure 3

.pdf

Additional Figure S3: Schematic of greenhouse experiment. Each leaf was paintbrush inoculated with 1mg uredospores and image of heavily infected leaf was taken 12dpi after completion of the experiment. Imaged in bottom is Patrick McMullen.

Additional Table 1

.xls

Gene ontology results for each group of differentially expressed genes defined though the contrast of susceptible and resistant genotypes.

Additional Table 2

.xls

Gene ontology results for each group of differentially expressed genes defined though the contrast of inoculated and the uninoculated control treatments.

Additional Table 3

.xls

Gene ontology results for each module from the network analysis of resistant genotypes.

Additional Table 4

.xls

Gene ontology results for each module from the network analysis of susceptible genotypes.

Additional Table 5

.xls

Gene ontology results for each eQTL hotspot.

Additional Table 6

.xls

List of candidate genes identified through differential expression, network analysis, and eQTL mapping.

Additional Table 7

.xls

Differentially expression and effector prediction results of *M. americana* transcripts.

Additional Table 8

.xls

Analysis of the *in-silico* proteome of the *M. americana* reference genome using SignalPv5.0 with default settings to generate an *in silico* secretome.

Additional Table 9

.xls

Analysis of the *M. americana* secretome for effector prediction using EffectorPv2.0 using the default settings.
